# Supplementary material
Source: PubMed Central journal article supplement (PMC4444427)
Supplement: cir-131-1851-s001.pdf [file cir-131-1851-s001.pdf]

**High Sensitivity Cardiac Troponin I and B-type Natriuretic Peptide as Predictors of  
Vascular Events in Primary Prevention: Impact of Statin Therapy**

Brendan M. Everett, MD, MPH; Tanja Zeller, PhD; Robert J. Glynn, ScD; Paul M Ridker,  
MD, MPH; Stefan Blankenberg, MD

**SUPPLEMENTAL MATERIAL**

Supplement Table 1. Baseline characteristics of the subcohort with samples assayed for high-sensitivity troponin I compared to the remainder of the JUPITER cohort

Supplement Table 2. Baseline characteristics of the study population stratified by B-type natriuretic peptide tertile

Supplement Table 3. Spearman correlations of biomarkers in men enrolled in JUPITER

Supplement Table 4. Spearman correlations of biomarkers in women enrolled in JUPITER

Supplement Figure 1. Risk of the JUPITER primary endpoint according to baseline category of high sensitivity cardiac troponin I and B-type natriuretic peptide stratified by random allocation to active rosuvastatin or placebo.

Supplement Figure 2. Adjusted relative risk of a first major cardiovascular event, according to random allocation to rosuvastatin 20 mg versus placebo.

**Supplement Table 1. Baseline characteristics of the subcohort with samples assayed for high-sensitivity troponin I compared to the remainder of the JUPITER cohort**

| Characteristic*                          | JUPITER participants with samples available | JUPITER participants without samples available | P-value |
|------------------------------------------|---------------------------------------------|------------------------------------------------|---------|
| N                                        | 12956                                       | 4846                                           | -       |
| Age                                      | 66 (60-71)                                  | 66 (61-71)                                     | 0.0001  |
| Female sex                               | 4696 (36.3)                                 | 2105 (43.4)                                    | <0.0001 |
| Race or ethnic group, n (%)              |                                             |                                                | <0.0001 |
| White                                    | 10594 (81.8)                                | 2089 (43.1)                                    |         |
| Black                                    | 944 (7.3)                                   | 1280 (26.4)                                    |         |
| Hispanic                                 | 1122 (8.7)                                  | 1139 (23.5)                                    |         |
| Other                                    | 294 (2.3)                                   | 338 (7.0)                                      |         |
| Hypertension, N (%)                      | 7208 (55.7)                                 | 3000 (61.9)                                    | <0.0001 |
| Systolic blood pressure, mm Hg           | 134 (124-146)                               | 135 (125-145)                                  | 0.47    |
| Diastolic blood pressure, mm Hg          | 80 (75-86)                                  | 80 (76-89)                                     | <0.0001 |
| Body mass index (kg/m <sup>2</sup> )     | 28.4 (25.4-32.0)                            | 28.1 (24.9-32.1)                               | <0.0001 |
| Current smoking, N (%)                   | 1952 (15.1)                                 | 868 (17.9)                                     | <0.0001 |
| Family history of premature MI, N (%)    | 1651 (12.8)                                 | 394 (8.2)                                      | <0.0001 |
| Diabetes, n (%)                          | 64 (0.5)                                    | 14 (0.3)                                       | 0.07    |
| Metabolic syndrome, n (%)                | 5219 (40.6)                                 | 2156 (44.7)                                    | <0.0001 |
| Impaired fasting glucose, N (%)          | 4214 (32.6)                                 | 1355 (28.1)                                    | <0.0001 |
| HbA1c (Q1-Q3), %                         | 5.7 (5.4-5.9)                               | 5.8 (5.5-6.0)                                  | <0.0001 |
| Fasting glucose, mg/dL                   | 95 (88-102)                                 | 93 (86-101)                                    | <0.0001 |
| Total cholesterol (Q1-Q3), mg/dL         | 186 (170-200)                               | 183 (165-198)                                  | <0.0001 |
| LDL cholesterol (Q1-Q3), mg/dL           | 109 (95-119)                                | 107 (91-118)                                   | <0.0001 |
| HDL cholesterol (Q1-Q3), mg/dL           | 49 (41-60)                                  | 47 (39-58)                                     | <0.0001 |
| hsCRP (Q1-Q3), mg/L                      | 4.1 (2.8-6.9)                               | 4.3 (2.9-7.1)                                  | <0.0001 |
| Estimated GFR (Q1-Q3), mL/min            | 73.3 (64.6-82.8)                            | 74.1 (64.5-88.4)                               | <0.0001 |
| Framingham risk score (Q1-Q3)            | 10 (6-16)                                   | 11 (6-16)                                      | 0.0003  |
| Reynolds risk score (Q1-Q3)              | 10 (6-16)                                   | 10 (6-16)                                      | 0.56    |
| Random allocation to rosuvastatin, N (%) | 6491 (50.1)                                 | 2410 (49.7)                                    | 0.66    |
|                                          |                                             |                                                |         |

\* Continuous variables are presented as median [quartile 1 (Q1)-quartile 3 (Q3)] and categorical variables are presented as N (%).

Abbreviations: BNP, B-type natriuretic peptide; GFR, glomerular filtration rate; HbA1c, hemoglobin A1c; HDL, high-density lipoprotein; hsCRP, high-sensitivity C-reactive protein; hsTnI, high-sensitivity cardiac troponin I; LDL, low density lipoprotein; Q1-Q3, value at the 25<sup>th</sup> (Q1) and 75<sup>th</sup> (Q3) percentiles

**Supplement Table 2. Baseline characteristics of the study population stratified by B-type natriuretic peptide tertile**

| Characteristic*                          | BNP Tertile 1    | BNP Tertile 2    | BNP Tertile 3    | P-value |
|------------------------------------------|------------------|------------------|------------------|---------|
| Range in men, ng/L                       | <20              | 20 to <28.6      | ≥28.6            |         |
| Range in women, ng/L                     | <20              | 20 to <44.4      | ≥44.4            |         |
| N events/N at risk, men                  | 54/3594          | 26/1096          | 88/2331          |         |
| N events/N at risk, women                | 10/1391          | 16/1303          | 42/1342          |         |
| Median (Q1-Q3) time to event, years      | 1.9 (1.5-2.2)    | 1.9 (1.5-2.3)    | 2.0 (1.5-2.4)    | <0.0001 |
| Age                                      | 63 (58-68)       | 66 (62-71)       | 69 (64-74)       | <0.0001 |
| Race or ethnic group, n (%)              |                  |                  |                  | <0.0001 |
| White                                    | 4080 (81.9)      | 1908 (79.5)      | 3020 (82.2)      |         |
| Black                                    | 398 (8.0)        | 169 (7.0)        | 244 (6.6)        |         |
| Hispanic                                 | 380 (7.6)        | 275 (11.5)       | 334 (9.1)        |         |
| Other                                    | 126 (2.5)        | 47 (2.0)         | 74 (2.0)         |         |
| Hypertension, N (%)                      | 2560 (51.4)      | 1344 (56.1)      | 2292 (62.4)      |         |
| Systolic blood pressure, mm Hg           | 132 (122-144)    | 134 (124-146)    | 138 (126-150)    | <0.0001 |
| Diastolic blood pressure, mm Hg          | 80 (76-88)       | 80 (74-86)       | 80 (74-87)       | <0.0001 |
| Body mass index (kg/m <sup>2</sup> )     | 28.7 (25.8-32.2) | 28.4 (25.4-31.8) | 27.9 (24.9-31.5) | <0.0001 |
| Current smoking, N (%)                   | 879 (17.6)       | 326 (13.6)       | 483 (13.2)       | <0.0001 |
| Family history of premature MI, N (%)    | 608 (12.3)       | 295 (12.3)       | 457 (12.5)       | 0.94    |
| Diabetes, n (%)                          | 27 (0.5)         | 12 (0.5)         | 14 (0.4)         | 0.56    |
| Metabolic syndrome, n (%)                | 2142 (43.4)      | 938 (39.5)       | 1345 (36.9)      | <0.0001 |
| Impaired fasting glucose, N (%)          | 1728 (34.8)      | 755 (31.6)       | 1086 (29.6)      | <0.0001 |
| HbA1c (Q1-Q3), %                         | 5.7 (5.4-5.9)    | 5.7 (5.5-5.9)    | 5.6 (5.4-5.9)    | 0.0001  |
| Fasting glucose, mg/dL                   | 95 (89-103)      | 94 (88-102)      | 94 (87-101)      | <0.0001 |
| Total cholesterol (Q1-Q3), mg/dL         | 186 (170-200)    | 189 (173-203)    | 184 (168-198)    | <0.0001 |
| LDL cholesterol (Q1-Q3), mg/dL           | 109 (95-119)     | 110 (97-120)     | 107 (93-119)     | <0.0001 |
| HDL cholesterol (Q1-Q3), mg/dL           | 47 (40-58)       | 52 (43-63)       | 51 (42-62)       | <0.0001 |
| hsCRP (Q1-Q3), mg/L                      | 4.1 (2.7-6.6)    | 4.0 (2.8-6.7)    | 4.2 (2.8-6.9)    | 0.12    |
| Estimated GFR (Q1-Q3), mL/min            | 75.9 (66.6-87.9) | 73.3 (64.7-82.2) | 70.8 (62.1-81.3) | <0.0001 |
| Framingham risk score (Q1-Q3)            | 10 (6-16)        | 8 (5-14)         | 12 (8-17)        | <0.0001 |
| Reynolds risk score (Q1-Q3)              | 9 (5-14)         | 8 (5-14)         | 12 (7-21)        | <0.0001 |
| Random allocation to rosuvastatin, N (%) | 2510 (50.4)      | 1195 (49.8)      | 1829 (49.8)      | 0.84    |

\* Continuous variables are presented as median [quartile 1 (Q1)-quartile 3 (Q3)]

Abbreviations: BNP, B-type natriuretic peptide; GFR, glomerular filtration rate; HbA1c, hemoglobin A1c; HDL, high-density lipoprotein; hsCRP, high-sensitivity C-reactive protein; hsTnI, high-sensitivity cardiac troponin I; LDL, low density lipoprotein; MI, myocardial infarction; Q1-Q3, value at the 25th (Q1) and 75th (Q3) percentiles

**Supplement Table 3. Spearman correlations of biomarkers in men enrolled in JUPITER**

|                   | BNP   | Total cholesterol | LDL-C  | HDL-C | hsCRP  | HbA1c  | eGFR   |
|-------------------|-------|-------------------|--------|-------|--------|--------|--------|
| hsTnI             | 0.30* | 0.07*             | 0.08*  | 0.01  | 0.07*  | 0.05*  | -0.18* |
| BNP               |       | -0.07*            | -0.05* | 0.11* | 0.04†  | -0.04‡ | -0.14* |
| Total cholesterol |       |                   | 0.73*  | 0.25* | -0.09* | 0.02   | -0.02§ |
| LDL-C             |       |                   |        | 0.02§ | -0.07* | 0.04‡  | -0.06* |
| HDL-C             |       |                   |        |       | -0.05* | -0.11* | 0.16*  |
| hsCRP             |       |                   |        |       |        | 0.10*  | 0.02   |
| HbA1c             |       |                   |        |       |        |        | -0.03‡ |

\*P<0.0001; †P<0.001; ‡P<0.01; §P<0.05

Abbreviations: BNP, B-type natriuretic peptide; eGFR, estimated glomerular filtration rate; HbA1c, hemoglobin A1c; HDL-C, high-density lipoprotein cholesterol; hsCRP, high-sensitivity C-reactive protein; hsTnI, high-sensitivity cardiac troponin I; LDL-C, low density lipoprotein cholesterol

**Supplement Table 4. Spearman correlations of biomarkers in women enrolled in JUPITER**

|                   | BNP   | Total cholesterol | LDL-C  | HDL-C  | hsCRP  | HbA1c  | eGFR   |
|-------------------|-------|-------------------|--------|--------|--------|--------|--------|
| hsTnI             | 0.25* | 0.01              | 0.05†  | -0.05† | 0.04‡  | 0.04‡  | -0.16* |
| BNP               |       | -0.06†            | -0.04§ | 0.03   | -0.04§ | -0.07* | -0.18* |
| Total cholesterol |       |                   | 0.74*  | 0.41*  | -0.10* | -0.08* | -0.07* |
| LDL-C             |       |                   |        | 0.04‡  | -0.06† | -0.01  | -0.04‡ |
| HDL-C             |       |                   |        |        | -0.14* | -0.21* | 0.04‡  |
| hsCRP             |       |                   |        |        |        | 0.15*  | -0.01  |
| HbA1c             |       |                   |        |        |        |        | 0.03§  |

\*P<0.0001; †P<0.001; ‡P<0.01; §P<0.05

Abbreviations: BNP, B-type natriuretic peptide; eGFR, estimated glomerular filtration rate; HbA1c, hemoglobin A1c; HDL-C, high-density lipoprotein cholesterol; hsCRP, high-sensitivity C-reactive protein; hsTnI, high-sensitivity cardiac troponin I; LDL-C, low density lipoprotein cholesterol

**Supplement Figure 1. Risk of the JUPITER primary endpoint according to baseline category of high sensitivity cardiac troponin I (blue) and B-type natriuretic peptide (light green) stratified by random allocation to active rosuvastatin (triangles) or placebo (circles).** Models are adjusted for age, race, sex, body mass index, history of hypertension, current smoking, family history of myocardial infarction, total cholesterol, high-density lipoprotein cholesterol, and high-sensitivity C-reactive protein.

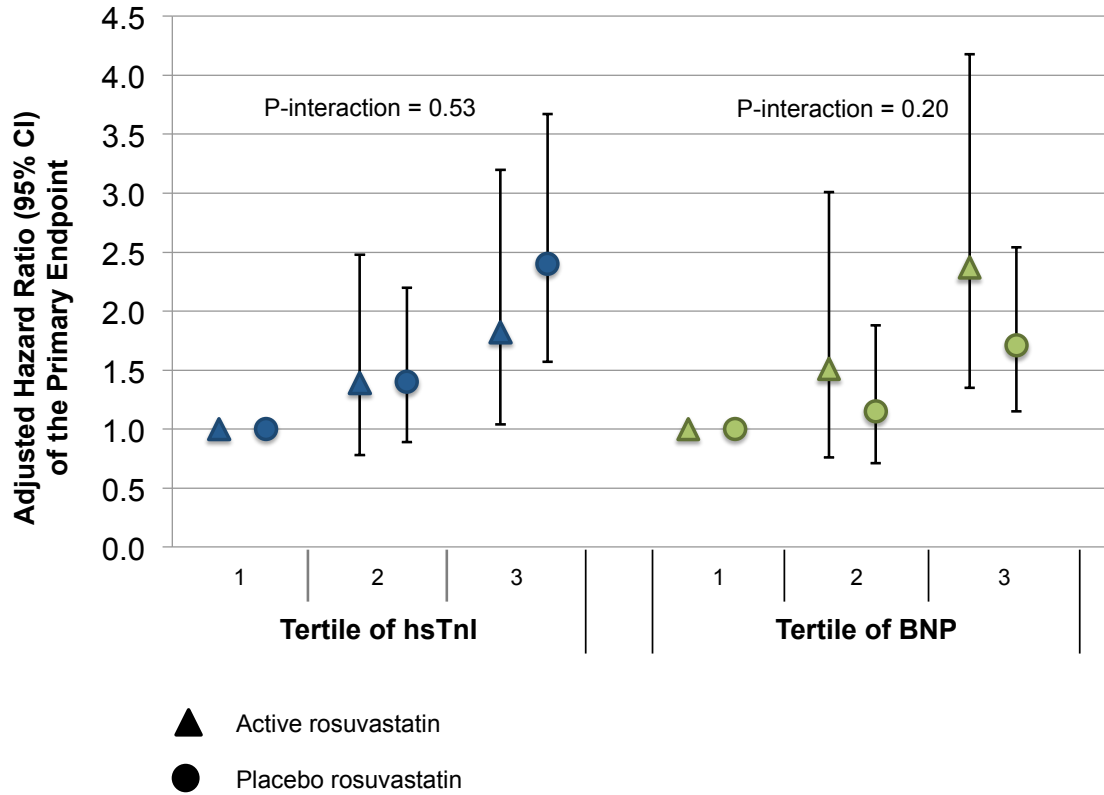

**Supplement Figure 2. Adjusted relative risk of a first major cardiovascular event, according to random allocation to rosuvastatin 20 mg daily versus placebo.** A first major cardiovascular event is defined as the JUPITER primary endpoint (non-fatal myocardial infarction, non-fatal stroke, hospitalization for unstable angina, arterial revascularization, or death from cardiovascular causes). There was no statistically significant evidence for heterogeneity of the effect of rosuvastatin across baseline categories of high-sensitivity troponin I (P-interaction = 0.53) or B-type natriuretic peptide (P-interaction = 0.20). Relative risk estimates were adjusted for age, sex, race, hypertension, smoking, body mass index, total cholesterol, high-density lipoprotein cholesterol, family history of coronary heart disease, and high-sensitivity C-reactive protein at baseline. The summary estimate is for the 12,956 participants with an hsTnI measure available.

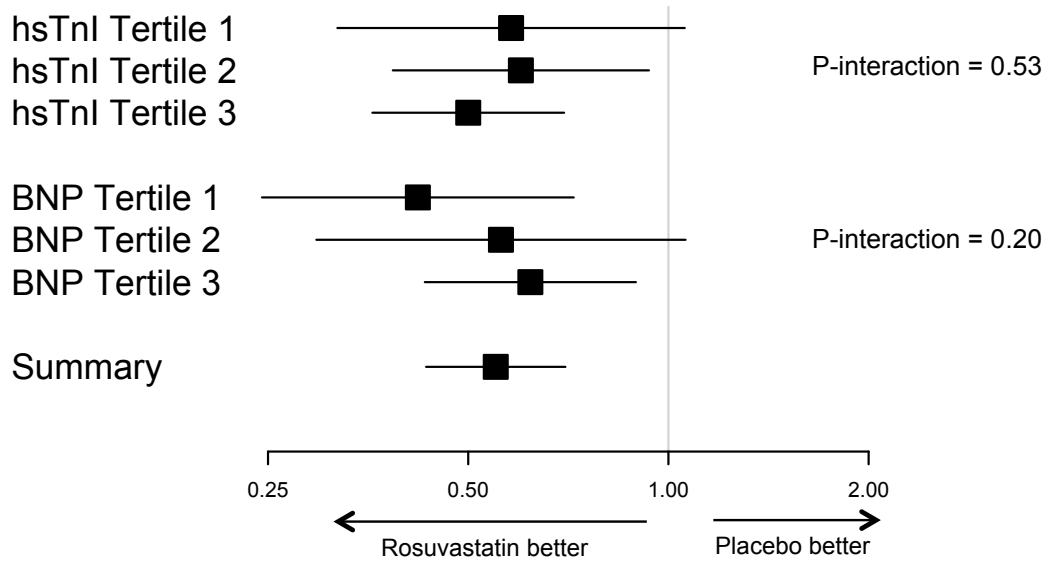

Adjusted Hazard Ratio of a First Major Cardiovascular Event
